# Supplementary material for: Sensitive and Quantitative Three-Color Protein Imaging in Fission Yeast Using Spectrally Diverse, Recoded Fluorescent Proteins with Experimentally-Characterized In Vivo Maturation Kinetics
Source: PubMed Central journal article supplement (PMC4968791; doi:10.1371/journal.pone.0159292), 2016-08-01

# SFigure 2

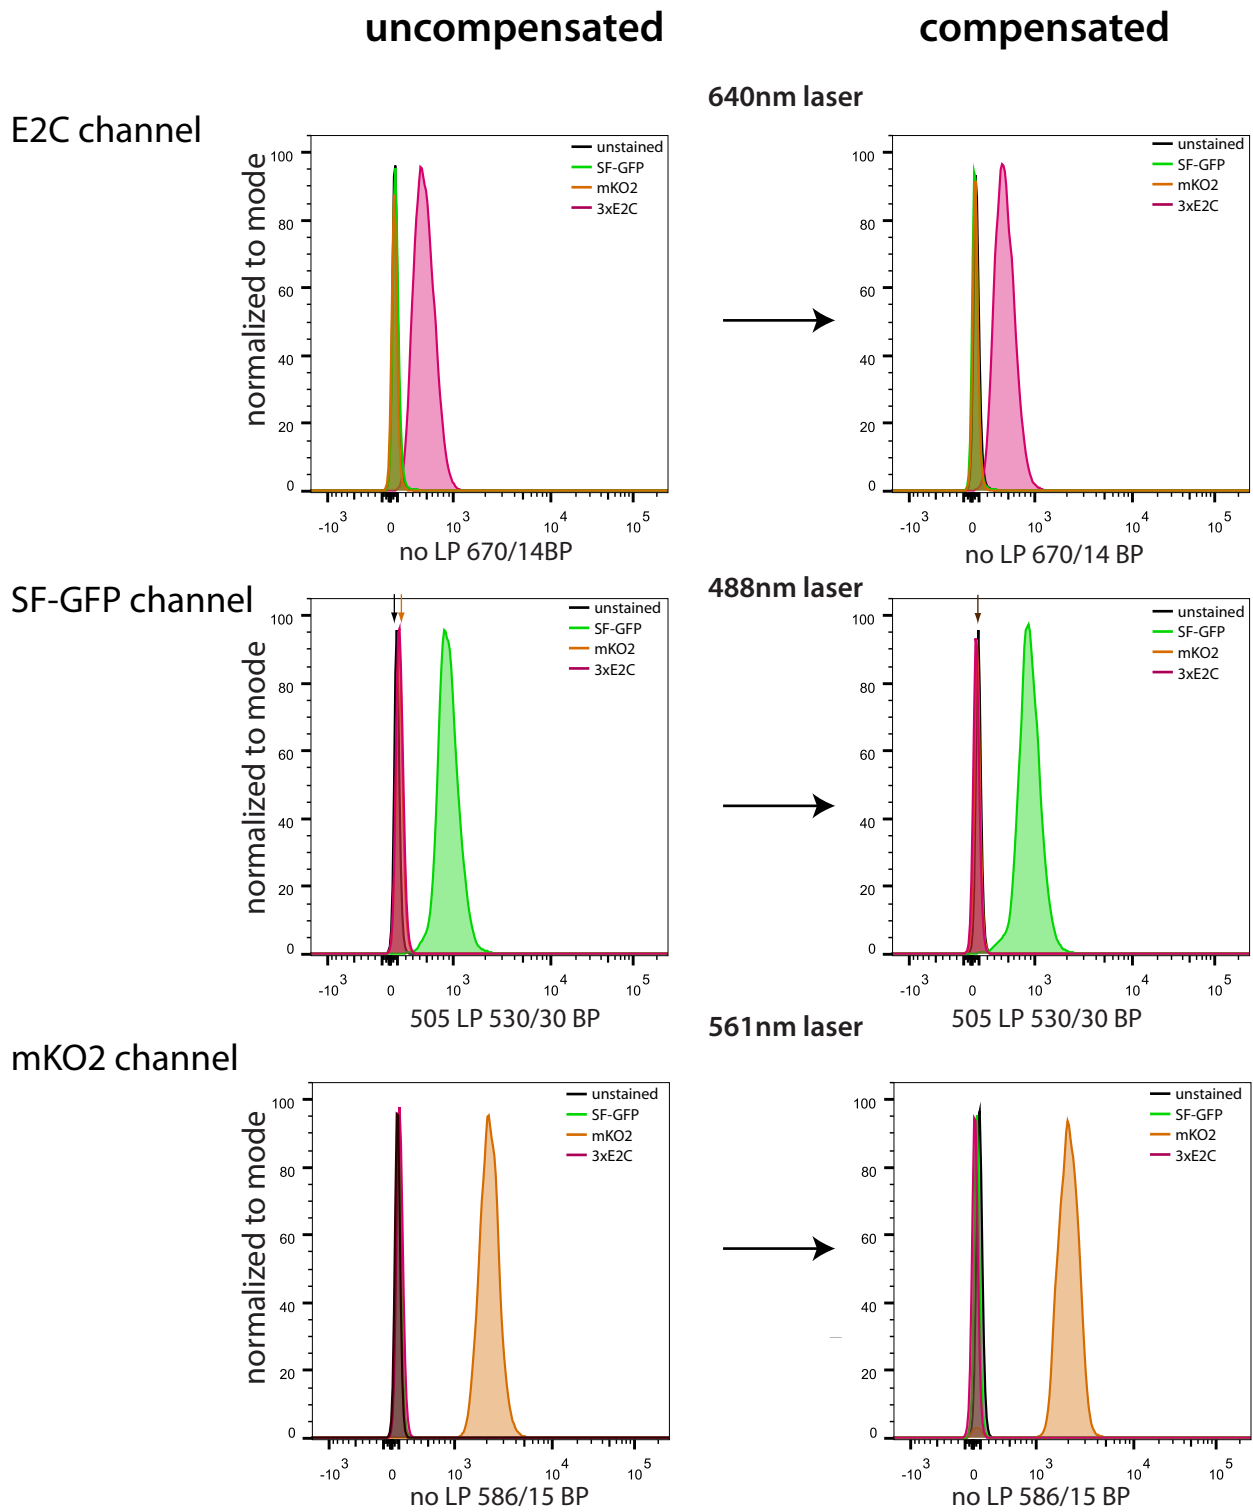

Supplement: pone.0159292.s002.pdf [file pone.0159292.s002.pdf]
