# Supplementary material for: Sensitive and Quantitative Three-Color Protein Imaging in Fission Yeast Using Spectrally Diverse, Recoded Fluorescent Proteins with Experimentally-Characterized In Vivo Maturation Kinetics
Source: PubMed Central journal article supplement (PMC4968791; doi:10.1371/journal.pone.0159292), 2016-08-01

# SFigure 3

## A

E2Crimson total protein  
parameter distributions

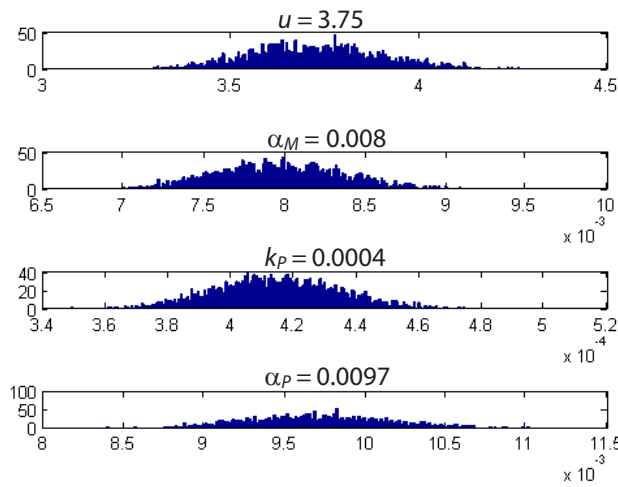

E2Crimson mature protein  
parameter distributions

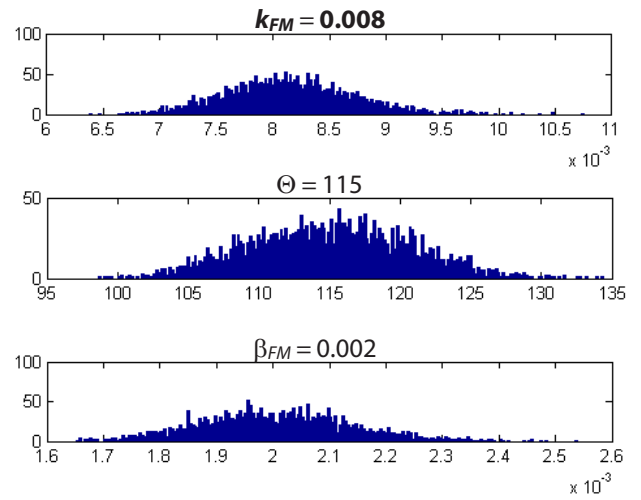

## B

superfolder GFP total protein  
parameter distributions

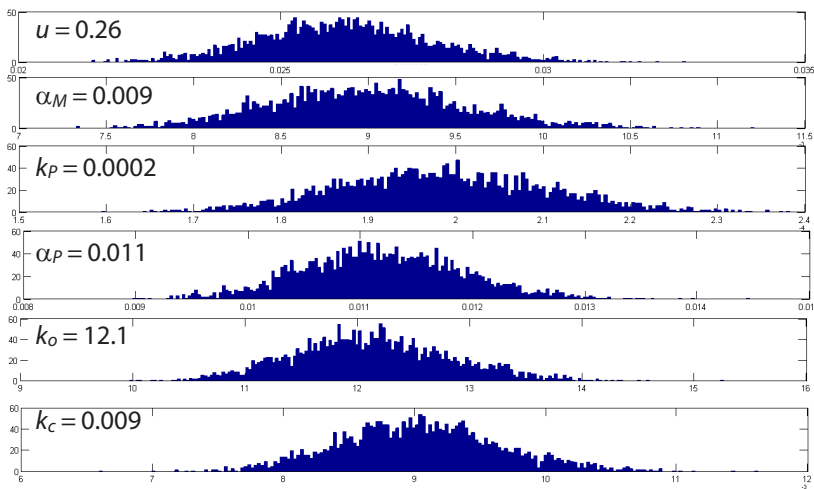

superfolder GFP mature protein  
parameter distributions

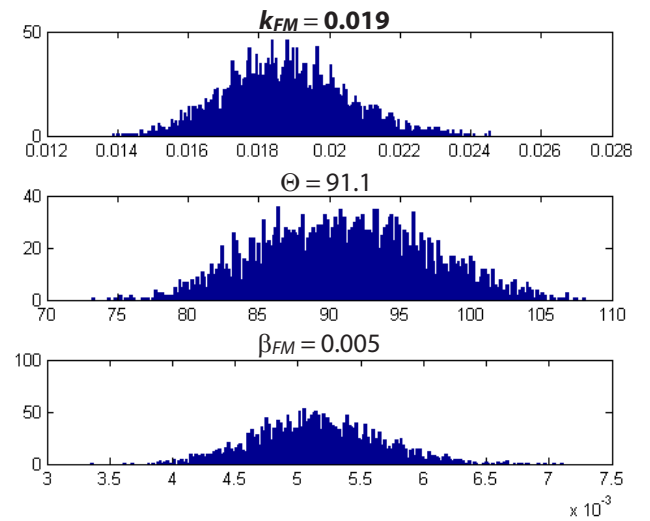

## C

mKO2 total protein  
parameter distributions

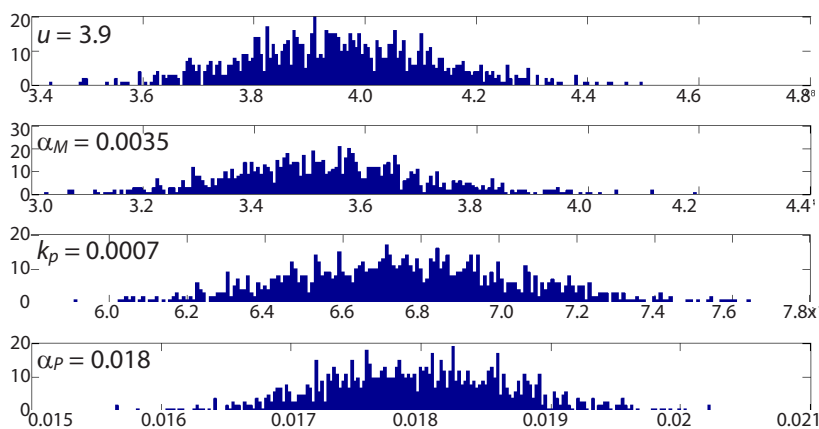

mKO2 mature protein  
parameter distributions

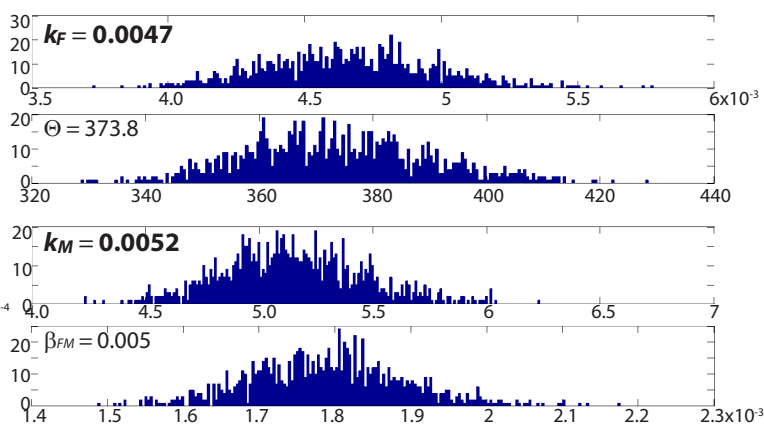

Supplement: pone.0159292.s003.pdf [file pone.0159292.s003.pdf]
